# Supplementary material
Source: PubMed Central journal article supplement (PMC4034197)
Supplement: 1406898111_pnas.201406898SI.pdf [file 1406898111_pnas.201406898SI.pdf]

# Supporting Information

Rumpf et al. 10.1073/pnas.1406898111

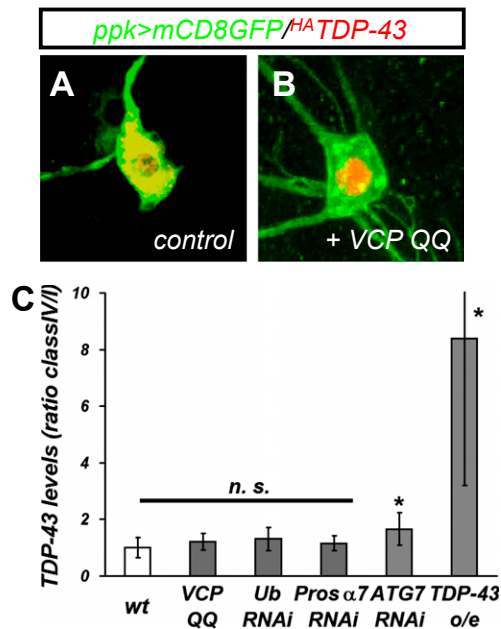

**Fig. S1.** Localization of transgenic tagged TAR–DNA-binding protein of 43 kilo-Dalton (TDP-43) and influence of ubiquitin–proteasome system (UPS) manipulations on TDP-43 levels. (A) Transgenic HA-tagged TDP-43 was expressed in class IV dendritic arborization (da) neurons and visualized with anti-HA (red), and class IV da neurons were visualized with anti-GFP staining (green). (B) HA–TDP-43 was coexpressed in class IV da neurons with Valosin-Containing Protein (VCP) QQ. (C) VCP and UPS manipulations do not affect TDP-43 levels. TDP-43 staining intensity was measured in class IV da neurons under the indicated UPS manipulations and normalized against TDP-43 staining intensity of adjacent class I da neurons ( $n = 10$  each). Statistical comparison was done by Student  $t$  test.

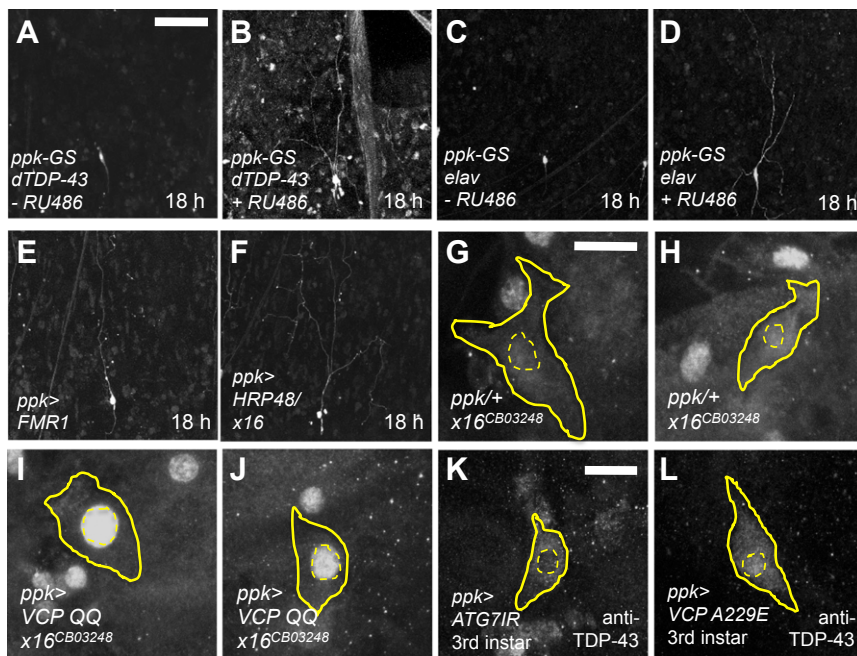

**Fig. 52.** Links between RNA-binding proteins, VCP, and class IV da neuron dendrite pruning. (A–D) Acuteness of TDP-43 and elav effects on pruning. TDP-43 or elav overexpression under *ppk-GeneSwitch* was induced by addition of 200  $\mu$ M RU486 24 h before puparium formation, and pruning was assessed 18 h after puparium formation. (A) TDP-43, control without RU486 induction (0/16 neurons with dendrites still attached to soma). (B) TDP-43, with RU486 induction (25/35 with attached dendrites,  $P < 0.005$ ). (C) elav, control without RU486 induction (0/62 with attached dendrites). (D) elav, with RU486 induction (44/76 with dendrites still attached to soma,  $P < 0.005$ ). (E) FMR1 overexpression causes pruning defects in class IV da neurons (15/30 with attached dendrites,  $P < 0.005$ ). (F) x16/HRP48 overexpression causes pruning defects (18/25 with attached dendrites,  $P < 0.005$ ). (G–J) Levels of an x16-GFP protein trap are increased upon VCP inhibition. (G and H) x16-GFP levels in control class IV da neurons. (I and J) x16-GFP levels in class IV da neurons upon VCP QQ coexpression under *ppk-GAL4*. (K) TDP-43 is largely cytoplasmic in class IV da neurons expressing ATG7 RNAi. (L) TDP-43 is largely nuclear in class IV da neurons expressing VCP A229E. (Scale bar in A, 50  $\mu$ m; and in G and K, 10  $\mu$ m.) Statistic analyses were with Fisher's exact test.

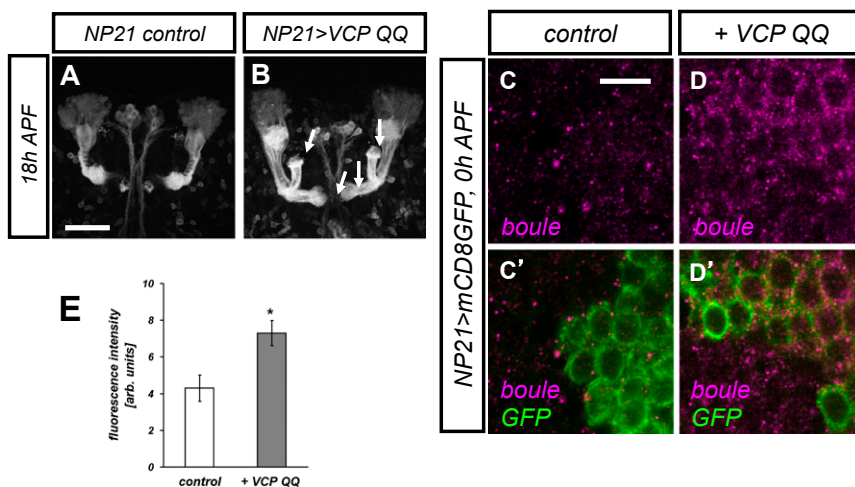

**Fig. 53.** VCP is required for mushroom body  $\gamma$  neuron axon pruning and affects boule levels. (A) Control  $\gamma$  neurons have pruned their axons at 18 h after puparium formation. (B) Neurons expressing VCP QQ have not pruned their axons at 18 h after puparium formation (18/18). (C and C') Boule levels in control  $\gamma$  neurons labeled with NP21-GAL4 at the white pupal stage (0 h after puparium formation). (D and D') Boule levels in  $\gamma$  neurons expressing VCP QQ. (E) Quantification of boule stainings in C and D. Boule staining intensity in  $\gamma$  neurons was normalized against staining intensity in cells not labeled by NP21-GAL4. (Scale bar in A, 100  $\mu$ m; in C, 10  $\mu$ m.)

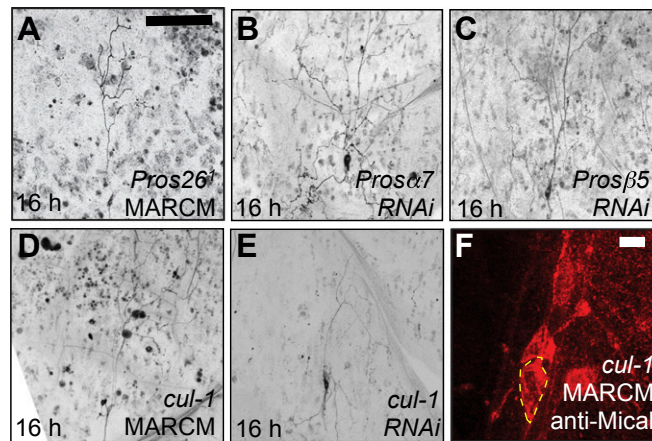

**Fig. 54.** 20S proteasome subunits and cullin-1 are required for pruning. (A) *Pros26<sup>1</sup>* mutant class IV da neuron at 16 h after puparium formation (8/10 with attached dendrites,  $P < 0.005$ ). (B) Expression of an RNAi construct directed against *Prosα7* causes pruning defects (15/17 with attached dendrites,  $P < 0.005$ ). (C) Expression of an RNAi construct directed against *Prosβ5* causes pruning defects (10/11 neurons with attached dendrites,  $P < 0.005$ ). (D–F) The Skp1/Cullin/F-box (SCF) subunit *cul-1* is required for class IV da neuron dendrite pruning. (D) A *cul-1* mutant Mosaic Analysis with a Repressible Cell Marker class IV da neuron retains attached dendrites at 16 h after puparium formation. (E) *cul-1* RNAi expressed under *ppk-GAL4* leads to pruning defects at 16 h after puparium formation (24/36 with attached dendrites,  $P < 0.005$ ). (F) Mical expression in class IV da neurons is not affected in a *cul-1* mutant class IV da neuron at 2 h after puparium formation. (Scale bar in A, 50  $\mu\text{m}$ ; in F, 10  $\mu\text{m}$ .)

**Table S1. RNA-binding proteins tested for overexpression phenotypes in class IV da neurons**

| RNA-binding protein | Expression construct | Phenotype, <i>ppk-GAL4</i> | Ref. |
|---------------------|----------------------|----------------------------|------|
| TDP-43              | UAS                  | Pruning defect             | 1    |
| elav                | UAS                  | Pruning defect             | 2    |
| FMR1                | UAS                  | Pruning defect             | 3    |
| x16/HRP48           | GS15869              | Pruning defect             |      |
| Cabeza (dFUS)       | EP1564               | —                          |      |
| dAtx2               | EP3145               | —                          | 4    |
| boule               | UAS                  | —                          |      |
| Bruno-3             | EP                   | —                          |      |
| Staufen             | UAS                  | —                          | 5    |
| nanos               | UAS                  | —                          | 5    |
| Pumilio             | UAS                  | —                          | 5    |
| tsunagi             | EP                   | —                          | 6    |
| CG17176             | EP                   | —                          | 6    |

- Lu Y, Ferris J, Gao FB (2009) Frontotemporal dementia and amyotrophic lateral sclerosis-associated disease protein TDP-43 promotes dendritic branching. *Mol Brain* 2:30–39.
- Koushika SP, Lisbin MJ, White K (1996) ELAV, a *Drosophila* neuron-specific protein, mediates the generation of an alternatively spliced neural protein isoform. *Curr Biol* 6(12):1634–1641.
- Zhang YQ, et al. (2001) *Drosophila* fragile X-related gene regulates the MAP1B homolog Futsch to control synaptic structure and function. *Cell* 107(5):591–603.
- Satterfield TF, Jackson SM, Pallanck LJ (2002) A *Drosophila* homolog of the polyglutamine disease gene SCA2 is a dosage-sensitive regulator of actin filament formation. *Genetics* 162(4):1687–1702.
- Ye B, et al. (2004) Nanos and Pumilio are essential for dendrite morphogenesis in *Drosophila* peripheral neurons. *Curr Biol* 14(4):314–321.
- Couthouis J, et al. (2011) A yeast functional screen predicts new candidate ALS disease genes. *Proc Natl Acad Sci USA* 108(52):20881–20890.
